# Supplementary material
Source: publisher figshare collection journal article supplement (https://sage.figshare.com/ndownloader/files/23101553)
Supplement: Supplementary file 1 [file 23101553]

### Supplemental Materials to

### “Learning melodic musical intervals: To block or to interleave?”

Stephen Wee Hun Lim , Sarah Shi Hui Wong and Si Chen

#### List of Reference Songs (Experiment 1)

| No. | Interval Type           | Reference Song                                       | Scale Degree of Low Pitch | Scale Degree of High Pitch | Counterbalanced Interval Group |
|-----|-------------------------|------------------------------------------------------|---------------------------|----------------------------|--------------------------------|
| 1   | Minor 2 <sup>nd</sup>   | Pink Panther                                         | Ti                        | Do                         | 1                              |
| 2   | Major 2 <sup>nd</sup>   | Happy Birthday to You                                | Sol                       | La                         | 2                              |
| 3   | Minor 3 <sup>rd</sup>   | So Long, Farewell<br>( <i>“The Sound of Music”</i> ) | Mi                        | Sol                        | 2                              |
| 4   | Major 3 <sup>rd</sup>   | When the Saints Go<br>Marching In                    | Do                        | Mi                         | 1                              |
| 5   | Perfect 4 <sup>th</sup> | Amazing Grace                                        | Sol                       | Do                         | 2                              |
| 6   | Tritone                 | <i>“The Simpsons”</i> Theme Song                     | Do                        | Fi                         | 1                              |
| 7   | Perfect 5 <sup>th</sup> | Twinkle Twinkle Little Star                          | Do                        | Sol                        | 1                              |
| 8   | Minor 6 <sup>th</sup>   | We are Young (Chorus)                                | La                        | Fa                         | 2                              |
| 9   | Major 6 <sup>th</sup>   | Jingle Bells                                         | Sol                       | Mi                         | 1                              |
| 10  | Minor 7 <sup>th</sup>   | The Winner Takes It All<br>(ABBA)                    | Sol                       | Fa                         | 1                              |
| 11  | Major 7 <sup>th</sup>   | Take On Me (A-ha)                                    | Do                        | Ti                         | 2                              |
| 12  | Perfect 8 <sup>th</sup> | Somewhere Over the<br>Rainbow                        | Do                        | Do                         | 2                              |

## Aural Training Information Sheet: Definitions (Experiments 1 and 2)

### SECTION A: DEFINITIONS

#### **Pitch**

A pitch is the “lowness” or “highness” of a musical note.

#### **Music Interval**

A music interval is the difference between any 2 different pitches (i.e., one low and one high). Two musical notes of the same pitch are not considered a music interval.

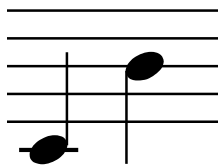

- ✓ Example of an interval
- Presence of 2 *different* pitches

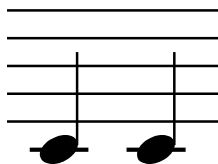

- ✗ Not an interval
- Presence of 2 *same* pitches

#### **12 Types of Intervals**

The name of each interval is based on:

- 1) Distance (i.e., 2<sup>nd</sup>, 3<sup>rd</sup>, 4<sup>th</sup>, 5<sup>th</sup>, 6<sup>th</sup>, 7<sup>th</sup>, 8<sup>th</sup>)
- 2) Tonal quality (i.e., Major, Minor, Perfect, Tritone)

| No. | Interval Name           |
|-----|-------------------------|
| 1   | Minor 2 <sup>nd</sup>   |
| 2   | Major 2 <sup>nd</sup>   |
| 3   | Minor 3 <sup>rd</sup>   |
| 4   | Major 3 <sup>rd</sup>   |
| 5   | Perfect 4 <sup>th</sup> |
| 6   | Tritone                 |
| 7   | Perfect 5 <sup>th</sup> |
| 8   | Minor 6 <sup>th</sup>   |
| 9   | Major 6 <sup>th</sup>   |
| 10  | Minor 7 <sup>th</sup>   |
| 11  | Major 7 <sup>th</sup>   |
| 12  | Perfect 8 <sup>th</sup> |

## Aural Training Information Sheet: Reference Songs (Experiment 1)

### SECTION B: REFERENCE SONGS

#### Reference Song

A song referenced by listeners to identify specific intervals. Typically, the first 2 pitches (low pitch and high pitch) of the reference song form a specific interval.

| No. | Interval Name           | Reference Song                                    | Lyrics    |            |
|-----|-------------------------|---------------------------------------------------|-----------|------------|
|     |                         |                                                   | Low Pitch | High Pitch |
| 1   | Minor 2 <sup>nd</sup>   | Pink Panther                                      | -         | -          |
| 2   | Major 2 <sup>nd</sup>   | Happy Birthday to You                             | Happy     | birth–     |
| 3   | Minor 3 <sup>rd</sup>   | So Long, Farewell (“ <i>The Sound of Music</i> ”) | So        | long       |
| 4   | Major 3 <sup>rd</sup>   | When the Saints Go Marching In                    | Oh        | when       |
| 5   | Perfect 4 <sup>th</sup> | Amazing Grace                                     | A–        | –ma        |
| 6   | Tritone                 | “ <i>The Simpsons</i> ” Theme Song                | The       | Simp–      |
| 7   | Perfect 5 <sup>th</sup> | Twinkle Twinkle Little Star                       | Twinkle   | twinkle    |
| 8   | Minor 6 <sup>th</sup>   | We are Young (Chorus)                             | Fi–       | –re        |
| 9   | Major 6 <sup>th</sup>   | Jingle Bells                                      | Da–       | –shing     |
| 10  | Minor 7 <sup>th</sup>   | The Winner Takes It All (ABBA)                    | The win–  | –ner       |
| 11  | Major 7 <sup>th</sup>   | Take On Me (A-ha)                                 | Take      | on         |
| 12  | Perfect 8 <sup>th</sup> | Somewhere Over the Rainbow                        | Some–     | –where     |

**Sample Study Sequences for Two Counterbalanced Versions (Experiment 1)****COUNTERBALANCED VERSION 1**

| <b>Learning Strategy</b> | <b>Interval Types Studied</b>                                                                                                                     |
|--------------------------|---------------------------------------------------------------------------------------------------------------------------------------------------|
| Blocked (B)              | Minor 2 <sup>nd</sup> , Major 3 <sup>rd</sup> , Tritone, Perfect 5 <sup>th</sup> , Major 6 <sup>th</sup> , Minor 7 <sup>th</sup>                  |
| Interleaved (I)          | Major 2 <sup>nd</sup> , Minor 3 <sup>rd</sup> , Perfect 4 <sup>th</sup> , Minor 6 <sup>th</sup> , Major 7 <sup>th</sup> , Perfect 8 <sup>th</sup> |

**Sample Presentation Order**

| <b>Block Order</b> | <b>Interval Stimuli</b>                                                                                                                                                                                                                                                                                                                                                                      |
|--------------------|----------------------------------------------------------------------------------------------------------------------------------------------------------------------------------------------------------------------------------------------------------------------------------------------------------------------------------------------------------------------------------------------|
| B                  | <ol style="list-style-type: none"> <li>1. Minor 7<sup>th</sup> on D<math>\flat</math></li> <li>2. Minor 7<sup>th</sup> on E</li> <li>3. Minor 7<sup>th</sup> on F<math>\sharp</math></li> </ol>                                                                                                                                                                                              |
| I                  | <ol style="list-style-type: none"> <li>1. Major 2<sup>nd</sup> on D<math>\flat</math></li> <li>2. Minor 3<sup>rd</sup> on D<math>\flat</math></li> <li>3. Perfect 4<sup>th</sup> on D<math>\flat</math></li> <li>4. Minor 6<sup>th</sup> on D<math>\flat</math></li> <li>5. Major 7<sup>th</sup> on D<math>\flat</math></li> <li>6. Perfect 8<sup>th</sup> on D<math>\flat</math></li> </ol> |
| B                  | <ol style="list-style-type: none"> <li>1. Perfect 5<sup>th</sup> on D<math>\flat</math></li> <li>2. Perfect 5<sup>th</sup> on D</li> <li>3. Perfect 5<sup>th</sup> on F</li> </ol>                                                                                                                                                                                                           |
| B                  | <ol style="list-style-type: none"> <li>1. Tritone on C</li> <li>2. Tritone on D<math>\flat</math></li> <li>3. Tritone on F</li> </ol>                                                                                                                                                                                                                                                        |
| I                  | <ol style="list-style-type: none"> <li>1. Major 2<sup>nd</sup> on G</li> <li>2. Minor 3<sup>rd</sup> on G</li> <li>3. Perfect 4<sup>th</sup> on G</li> <li>4. Minor 6<sup>th</sup> on G</li> <li>5. Major 7<sup>th</sup> on G</li> <li>6. Perfect 8<sup>th</sup> on G</li> </ol>                                                                                                             |
| B                  | <ol style="list-style-type: none"> <li>1. Major 3<sup>rd</sup> on C</li> </ol>                                                                                                                                                                                                                                                                                                               |

|   |                                                                                                                                                                                                                                                        |
|---|--------------------------------------------------------------------------------------------------------------------------------------------------------------------------------------------------------------------------------------------------------|
|   | 2. Major 3 <sup>rd</sup> on E<br>3. Major 3 <sup>rd</sup> on F                                                                                                                                                                                         |
| B | 1. Major 6 <sup>th</sup> on C<br>2. Major 6 <sup>th</sup> on E $\flat$<br>3. Major 6 <sup>th</sup> on E                                                                                                                                                |
| I | 1. Major 2 <sup>nd</sup> on A $\flat$<br>2. Minor 3 <sup>rd</sup> on A $\flat$<br>3. Perfect 4 <sup>th</sup> on A $\flat$<br>4. Minor 6 <sup>th</sup> on A $\flat$<br>5. Major 7 <sup>th</sup> on A $\flat$<br>6. Perfect 8 <sup>th</sup> on A $\flat$ |
| B | 1. Minor 2 <sup>nd</sup> on D<br>2. Minor 2 <sup>nd</sup> on E $\flat$<br>3. Minor 2 <sup>nd</sup> on E                                                                                                                                                |

*Note.* The order of presentation within each block was randomized for each participant.

### **COUNTERBALANCED VERSION 2**

| <b>Learning Strategy</b> | <b>Interval Types Studied</b>                                                                                                                     |
|--------------------------|---------------------------------------------------------------------------------------------------------------------------------------------------|
| Blocked (B)              | Major 2 <sup>nd</sup> , Minor 3 <sup>rd</sup> , Perfect 4 <sup>th</sup> , Minor 6 <sup>th</sup> , Major 7 <sup>th</sup> , Perfect 8 <sup>th</sup> |
| Interleaved (I)          | Minor 2 <sup>nd</sup> , Major 3 <sup>rd</sup> , Tritone, Perfect 5 <sup>th</sup> , Major 6 <sup>th</sup> , Minor 7 <sup>th</sup>                  |

### **Sample Presentation Order**

| <b>Block Order</b> | <b>Interval Stimuli</b>                                                                                                                               |
|--------------------|-------------------------------------------------------------------------------------------------------------------------------------------------------|
| B                  | 1. Minor 3 <sup>rd</sup> on A $\flat$<br>2. Minor 3 <sup>rd</sup> on A<br>3. Minor 3 <sup>rd</sup> on C                                               |
| I                  | 1. Minor 2 <sup>nd</sup> on C<br>2. Major 3 <sup>rd</sup> on C<br>3. Tritone on C<br>4. Perfect 5 <sup>th</sup> on C<br>5. Major 6 <sup>th</sup> on C |

|   |                                                                                                                                                                                                                                        |
|---|----------------------------------------------------------------------------------------------------------------------------------------------------------------------------------------------------------------------------------------|
|   | 6. Minor 7 <sup>th</sup> on C                                                                                                                                                                                                          |
| B | 1. Major 7 <sup>th</sup> on G<br>2. Major 7 <sup>th</sup> on A $\flat$<br>3. Major 7 <sup>th</sup> on B $\flat$                                                                                                                        |
| B | 1. Perfect 8 <sup>th</sup> on G<br>2. Perfect 8 <sup>th</sup> on A<br>3. Perfect 8 <sup>th</sup> on B $\flat$                                                                                                                          |
| I | 1. Minor 2 <sup>nd</sup> on E<br>2. Major 3 <sup>rd</sup> on E<br>3. Tritone on E<br>4. Perfect 5 <sup>th</sup> on E<br>5. Major 6 <sup>th</sup> on E<br>6. Minor 7 <sup>th</sup> on E                                                 |
| B | 1. Minor 6 <sup>th</sup> on A<br>2. Minor 6 <sup>th</sup> on B $\flat$<br>3. Minor 6 <sup>th</sup> on B                                                                                                                                |
| B | 1. Major 2 <sup>nd</sup> on F<br>2. Major 2 <sup>nd</sup> on B $\flat$<br>3. Major 2 <sup>nd</sup> on B                                                                                                                                |
| I | 1. Minor 2 <sup>nd</sup> on B $\flat$<br>2. Major 3 <sup>rd</sup> on B $\flat$<br>3. Tritone on B $\flat$<br>4. Perfect 5 <sup>th</sup> on B $\flat$<br>5. Major 6 <sup>th</sup> on B $\flat$<br>6. Minor 7 <sup>th</sup> on B $\flat$ |
| B | 1. Perfect 4 <sup>th</sup> on G<br>2. Perfect 4 <sup>th</sup> on A $\flat$<br>3. Perfect 4 <sup>th</sup> on B $\flat$                                                                                                                  |

*Note.* The order of presentation within each block was randomized for each participant.

**Means and Standard Deviations of Participants' Scores on the Goldsmiths  
Musical Sophistication Index (Gold-MSI)**

|                                |                     | <b>Experiment 1</b>    |           | <b>Experiment 2</b>    |           |
|--------------------------------|---------------------|------------------------|-----------|------------------------|-----------|
|                                |                     | <b>(<i>N</i> = 44)</b> |           | <b>(<i>N</i> = 44)</b> |           |
| <b>Gold-MSI Subscale</b>       | <b>No. of Items</b> | <i>M</i>               | <i>SD</i> | <i>M</i>               | <i>SD</i> |
| Active Musical Engagement      | 9                   | 30.18                  | 8.30      | 31.02                  | 8.93      |
| Perceptual Abilities           | 9                   | 41.57                  | 7.89      | 41.77                  | 8.73      |
| Musical Training               | 7                   | 16.93                  | 7.10      | 15.52                  | 6.73      |
| Emotional Responses to Music   | 6                   | 28.25                  | 4.45      | 29.00                  | 4.23      |
| Singing Abilities              | 7                   | 24.64                  | 7.60      | 26.05                  | 9.03      |
| General Musical Sophistication | 18                  | 59.59                  | 16.24     | 61.16                  | 18.59     |

*Note.* All ratings were performed on a 7-point scale.
